# Supplementary material
Source: PubMed Central journal article supplement (PMC5973797)
Supplement: NIHMS968273-supplement-Suppl_Table_1.pdf [file NIHMS968273-supplement-Suppl_Table_1.pdf]

## Profiling Alectinib in HeLa live cell

| Kinase     | Reference Sequence   | Labeling Site | Alectinib 5µM |
|------------|----------------------|---------------|---------------|
| CLK3       | UniRef100_FLHENQLTF  | Lys2          | ND            |
| EphB2      | UniRef100_FLEDDTSDP  | Activation L  | ND            |
| STLK6      | UniRef100_HTPTGTLVT  | Lys1          | ND            |
| YSK1       | UniRef100_EVVAIKIIDL | Lys1          | ND            |
| ZC3/MINK   | UniRef100_TGQLAAIKV  | Lys1          | ND            |
| CHK2       | UniRef100_DLKPENVLL  | Lys2          | >99           |
| CaMKK2     | UniRef100_LAYNENDN   | Lys1          | >98           |
| CHK2       | UniRef100_VAIKIISK   | Lys1          | >98           |
| SRPK1, SRP | UniRef100_FVAMKVVK   | Lys1          | >95           |
| CaMKK2     | UniRef100_DIKPSNLLV  | Lys2          | 96.1          |
| FER        | UniRef100_TSVAVKTCK  | Lys1          | 95.4          |
| SRPK1      | UniRef100_IHHTDIKPEN | Lys2          | 92.4          |
| CaMK4      | UniRef100_DLKPENLLY  | Lys2          | 91.9          |
| ACK        | UniRef100_TVSVAVKCL  | Lys1          | 90.4          |
| CaMK2d     | UniRef100_IPTGQEYAA  | Lys1          | 85.1          |
| RSK1 doma  | UniRef100_DLKPENILLI | Lys2          | 84.7          |
| RSK2 doma  | UniRef100_LTDFGLSKE  | Activation L  | 84.3          |
| RSK2 doma  | UniRef100_DLKPENILLI | Lys2          | 84.2          |
| RSK1 doma  | UniRef100_LTDFGLSKE  | Activation L  | 83.6          |
| RSK1 doma  | UniRef100_KVTRPDSGF  | Lys1          | 83.5          |
| RSK1 doma  | UniRef100_DLKPENILLI | Lys2          | 82.9          |
| CaMK2g     | UniRef100_TSTQEYAAK  | Lys1          | 81.9          |
| FER        | UniRef100_QEDGGVYS   | Activation L  | 80.9          |
| RSK1 doma  | UniRef100_DLKPSNILY  | Lys2          | 78.5          |
| MELK       | UniRef100_DLKPENLLFI | Lys2          | 78.5          |
| STLK5      | UniRef100_YSVKVLPMI  | Activation L  | 76.6          |
| IRAK1      | UniRef100_AIQFLHQDS  | Lys2          | 76.5          |
| CaMKK1     | UniRef100_DIKPSNLLL  | Lys2          | 74.3          |
| EphB4      | UniRef100_FLEENSSDP  | Activation L  | 73.7          |
| KHS2       | UniRef100_NVNTGELA   | Lys1          | 70.7          |
| CaMK2a, C  | UniRef100_DLKPENLLL  | Lys2          | 68.0          |
| RSK2 doma  | UniRef100_DLKPSNILY  | Lys2          | 66.9          |
| STLK3      | UniRef100_DLKAGNILL  | Lys2          | 66.1          |
| RSK2 doma  | UniRef100_VLGQGSFGI  | ATP Loop      | 65.9          |
| LOK        | UniRef100_DLKAGNVLI  | Lys2          | 65.8          |
| SLK        | UniRef100_DLKAGNILF  | Lys2          | 61.4          |
| FAK        | UniRef100_YMEDSTYYI  | Activation L  | 57.0          |
| FAK        | UniRef100_CIGEGQFGI  | Lys1          | 54.8          |
| IRAK4      | UniRef100_DIKSANILL  | Lys2          | 53.2          |
| SNRK       | UniRef100_VAVKVIDK   | Lys1          | 52.5          |
| SNRK       | UniRef100_DLKPENVVV  | Lys2          | 51.6          |
| PHKg2      | UniRef100_ATGHEFAVI  | Lys1          | 51.4          |
| IRAK4      | UniRef100_GYVNNTTV   | Lys1          | 51.0          |
| MAP3K2, N  | UniRef100_DIKGANILR  | Lys2          | 46.9          |
| SGK3       | UniRef100_FYAVKVLQK  | Lys1          | 46.5          |

### Labeling Site Key

|              |                          |
|--------------|--------------------------|
| Lys1         | Conserved Lysine 1       |
| Lys2         | Conserved Lysine 2       |
| ATP Loop     | ATP binding loop         |
| Activation L | Activation loop          |
| ATP          | ATP site in non-canonic  |
| Protein Kin  | Other lysine within kina |
| Other        | Labeling of residue outs |

|                                                                                     |                        |
|-------------------------------------------------------------------------------------|------------------------|
|  | >90% Inhibition        |
|  | 75 - 90% Inhibition    |
|  | 50 - 75% Inhibition    |
|  | 35 - 50% Inhibition    |
|  | No change              |
|  | >100% increase in MS : |
| ND                                                                                  | Not determined         |

Data points inhibited >35% & not

|             |                                 |      |
|-------------|---------------------------------|------|
| MAP3K4      | UniRef100_DIKGANIFL1 Lys2       | 46.5 |
| PIP4K2C     | UniRef100_VKELPTLKD ATP         | 44.3 |
| OSR1        | UniRef100_DVKAGNILL Lys2        | 43.9 |
| KHS1        | UniRef100_NVHTGELA Lys1         | 42.2 |
| PIP4K2C     | UniRef100_TLVIKEVSSE ATP        | 42.2 |
| ILK         | UniRef100_ISMADVKFS Protein Kin | 41.9 |
| ULK3        | UniRef100_NISHLDLKPI Lys2       | 41.1 |
| p70S6Kb     | UniRef100_DLKPENIML Lys2        | 40.6 |
| KSR1        | UniRef100_SKNVFYDN( Activation  | 39.3 |
| LOK         | UniRef100_NKETGALA Lys1         | 38.5 |
| BRAF        | UniRef100_DLKSNIFLI Lys2        | 37.8 |
| PIK3C2B     | UniRef100_VIFKCGDDL ATP         | 37.7 |
| GCK         | UniRef100_DIKGANLLL Lys2        | 37.3 |
| ULK3        | UniRef100_EVVAIKCVA Lys1        | 34.1 |
| RSKL1       | UniRef100_VLGVIDKVL ATP         | 33.9 |
| NEK3        | UniRef100_SKNIFLTQN Activation  | 33.6 |
| ARAF        | UniRef100_DLKSNIFLI Lys2        | 33.4 |
| STLK6       | UniRef100_SIKASHILIS Lys2       | 33.1 |
| LATS1       | UniRef100_ALYATKTLR Lys1        | 32.6 |
| SGK3        | UniRef100_IVYRDLKPEI Lys2       | 31.7 |
| PAN3        | UniRef100_VMDPTKILI ATP         | 30.9 |
| TAK1        | UniRef100_DLKPPNLLL Lys2        | 30.4 |
| LYN         | UniRef100_EGAKFPIKM Activation  | 30.2 |
| MAP2K7      | UniRef100_DVKPSNILLI Lys2       | 29.9 |
| PLK1        | UniRef100_DLKLGNLFL Lys2        | 28.6 |
| LATS2       | UniRef100_VDTHALYAI Lys1        | 28.5 |
| IKKe, TBK1  | UniRef100_DIKPGNIMF Lys2        | 27.5 |
| MAP2K5      | UniRef100_DVKPSNML Lys2         | 27.4 |
| TBK1        | UniRef100_TGDLFAIKV Lys1        | 26.7 |
| NEK8        | UniRef100_DLKTQNILLI Lys2       | 26.6 |
| PFTAIRE1    | UniRef100_DLK PQNLLI Lys2       | 26.3 |
| ZC1/HGK, Z  | UniRef100_DIKGQNVLL Lys2        | 26.2 |
| KSR1, KSR2  | UniRef100_SKNVFYDN( Activation  | 25.6 |
| Erk5        | UniRef100_DLKPSNLLV Lys2        | 25.6 |
| AMPKa1, A   | UniRef100_DLKPENVLL Lys2        | 25.0 |
| PFTAIRE1    | UniRef100_LVALKVIR Lys1         | 24.5 |
| LATS1       | UniRef100_DIKPDNILID Lys2       | 24.4 |
| Wnk1, Wnk   | UniRef100_DLKCDNIFIT Lys2       | 24.4 |
| ULK1        | UniRef100_DLK PQNILL Lys2       | 24.2 |
| MET         | UniRef100_IHCAVKSLN Lys1        | 23.6 |
| MAPKAPK3    | UniRef100_QVLGLGVN ATP Loop     | 22.7 |
| LYN         | UniRef100_VAVKTLKPC Lys1        | 22.7 |
| PKD3        | UniRef100_DVAIKVIDK Lys1        | 21.7 |
| Erk2        | UniRef100_DLKPSNLLLI Lys2       | 20.2 |
| GCK         | UniRef100_DTVTSELAA Lys1        | 19.6 |
| p38a        | UniRef100_QELNKTIWI Protein Kin | 18.6 |
| PCTAIRE1, f | UniRef100_DLK PQNLLII Lys2      | 18.5 |
| CHK1        | UniRef100_DIKPENLLLI Lys2       | 18.4 |
| p70S6K      | UniRef100_DLKPENIML Lys2        | 17.7 |

|             |                      |             |      |
|-------------|----------------------|-------------|------|
| Erk1        | UniRef100_DLKPSNLLI  | Lys2        | 17.7 |
| MLK3        | UniRef100_DLKSNILLI  | Lys2        | 17.7 |
| p38a        | UniRef100_DLKPSNLAV  | Lys2        | 17.4 |
| MSK2 dom    | UniRef100_DLKLENVLL  | Lys2        | 17.2 |
| p38d, p38g  | UniRef100_DLKPGNLA   | Lys2        | 16.9 |
| FGFR1, FM   | UniRef100_VAVKMLK    | Lys1        | 16.6 |
| PCTAIRE2, F | UniRef100_SKLTENLVA  | Lys1        | 15.5 |
| MAP2K3      | UniRef100_HAQSGTIM   | Lys1        | 15.4 |
| NEK6, NEK7  | UniRef100_DIKPANVFI  | Lys2        | 15.1 |
| AKT2, AKT3  | UniRef100_GTFGKVILV  | ATP Loop    | 13.8 |
| MAP3K5      | UniRef100_DIKGDNVLI  | Lys2        | 13.5 |
| JNK1, JNK2, | UniRef100_DLKPSNIVV  | Lys2        | 13.4 |
| MAP2K5      | UniRef100_ILAVKVILLD | Lys1        | 12.8 |
| CaMK1d      | UniRef100_LFAVKCIPK  | Lys1        | 12.3 |
| HER2/ErbB   | UniRef100_GIWIPDGEN  | Lys1        | 11.6 |
| AMPKa1, A   | UniRef100_VAVKILNR   | Lys1        | 11.4 |
| CSK         | UniRef100_VSDFGLTKE  | Activation  | 10.7 |
| PLK1        | UniRef100_CFEISDADTI | Lys1        | 10.4 |
| ZAK         | UniRef100_WISQDKEV   | Lys1        | 9.4  |
| ILK         | UniRef100_WQGNDIV    | Lys1        | 8.6  |
| PCTAIRE1    | UniRef100_SKLTDNLVA  | Lys1        | 7.7  |
| MST1, MST   | UniRef100_DIKAGNILLI | Lys2        | 7.2  |
| AMPKa1      | UniRef100_IGHYILGDTI | ATP Loop    | 7.0  |
| AKT1        | UniRef100_GTFGKVILV  | ATP Loop    | 6.8  |
| MLK4        | UniRef100_DLKSSNILLI | Lys2        | 6.5  |
| CaMK1a      | UniRef100_LVAIKCIAK  | Lys1        | 6.2  |
| EGFR        | UniRef100_LLGAEKEY   | Activation  | 5.2  |
| Wnk1, Wnk   | UniRef100_IGDLGLATLI | Activation  | 5.1  |
| PI4KB       | UniRef100_VPHTQAVV   | ATP         | 4.8  |
| CaMK1d      | UniRef100_DLKPENLLY  | Lys2        | 4.2  |
| Wnk1, Wnk   | UniRef100_GSFKTVYK   | ATP Loop    | 4.0  |
| PI4KB       | UniRef100_LLSVIVKCGI | ATP         | 3.9  |
| SMG1        | UniRef100_DTVTIHSVG  | ATP         | 3.7  |
| MAP2K1, N   | UniRef100_KLIHLEIKPA | Lys1        | 3.4  |
| PKN1        | UniRef100_DLKLDNLLI  | Lys2        | 3.0  |
| NEK9        | UniRef100_DIKTLNIFLT | Lys2        | 2.7  |
| MAP2K3      | UniRef100_DVKPSNVLI  | Lys2        | 2.6  |
| MAP2K6      | UniRef100_HVPSGQIM   | Lys1        | 2.2  |
| CDK5        | UniRef100_DLKPQNLLI  | Lys2        | 1.8  |
| CDK2        | UniRef100_LTGEVVALK  | Lys1        | 1.3  |
| CCRK        | UniRef100_DLKPANLLI  | Lys2        | 1.1  |
| MSK1 dom    | UniRef100_DIKLENILLD | Lys2        | 0.8  |
| MAP3K2      | UniRef100_ELAVKQVQI  | Lys1        | 0.4  |
| CDC2        | UniRef100_DLKPQNLLI  | Lys2        | -0.5 |
| IKKa        | UniRef100_DLKPENIVLI | Lys2        | -1.6 |
| p38b        | UniRef100_QELNKTVM   | Protein Kin | -1.9 |
| NEK9        | UniRef100_RTEDDSLVM  | Lys1        | -2.0 |
| CDC2        | UniRef100_DLKPQNLLI  | Lys2        | -2.7 |
| CDK5        | UniRef100_NRETHEIVA  | Lys1        | -3.4 |

|            |                                 |       |
|------------|---------------------------------|-------|
| LATS2      | UniRef100_DIKPDNILID Lys2       | -4.0  |
| MAP3K3     | UniRef100_ELASKQVQf Lys1        | -4.1  |
| MAP2K1, N  | UniRef100_DVKPSNILV Lys2        | -4.2  |
| NEK1       | UniRef100_DIKSQNIFL1 Lys2       | -4.4  |
| ITPK1      | UniRef100_ESIFFNSHN' ATP        | -4.6  |
| NEK4       | UniRef100_DLKTQNVFI Lys2        | -5.8  |
| PEK        | UniRef100_DLKPSNIFF1 Lys2       | -6.0  |
| NDR1       | UniRef100_DTGHVYAM Lys1         | -7.1  |
| NDR1       | UniRef100_DIKPDNLLLI Lys2       | -7.7  |
| MAP2K4     | UniRef100_DIKPSNILLD Lys2       | -9.1  |
| ABL, ARG   | UniRef100_YSLTVAVKT Lys1        | -9.3  |
| NEK7       | UniRef100_AACLLDGVF Lys1        | -9.3  |
| MAP2K1     | UniRef100_IMHRDVKP' Lys2        | -9.4  |
| PIP5K3     | UniRef100_GGKSGAAF' ATP         | -9.6  |
| AurA       | UniRef100_FILALKVLFK Lys1       | -9.6  |
| SGK        | UniRef100_HKAEEVFYA Lys1        | -10.2 |
| CDK7       | UniRef100_DKNTNQIV' Lys1        | -11.8 |
| JAK1       | UniRef100_QLASALSYL Protein Kin | -12.0 |
| CK2a1      | UniRef100_GGPNITLAI Protein Kin | -12.2 |
| PKD2       | UniRef100_DVAVKVIDf Lys1        | -12.3 |
| IKKe       | UniRef100_SGELVAVKV Lys1        | -12.7 |
| MAP2K4     | UniRef100_MVHKPSGC Lys1         | -12.7 |
| MAP3K6     | UniRef100_DIKGDNVLI Lys2        | -12.9 |
| SLK        | UniRef100_ETSVLAAAK Lys1        | -13.4 |
| IKKb       | UniRef100_WHNQETGI Lys1         | -13.7 |
| MST1       | UniRef100_ETGQIVAIK' Lys1       | -13.8 |
| PIK3C3     | UniRef100_TEDGGKYP' ATP         | -13.8 |
| AurA       | UniRef100_DIKPENLLLC Lys2       | -14.5 |
| MET        | UniRef100_DMYDKEYY Activation   | -15.1 |
| CSK        | UniRef100_VAVKCIK Lys1          | -15.7 |
| MAP3K1     | UniRef100_DVKGANLLI Lys2        | -16.6 |
| BARK1      | UniRef100_DLKPANILLI Lys2       | -17.1 |
| CDK2       | UniRef100_DLKPQNLLII Lys2       | -17.5 |
| PKN1       | UniRef100_VLLSEFRPSC Lys1       | -17.8 |
| ABL, ARG   | UniRef100_LMTGDITYT Activation  | -18.2 |
| NuaK2      | UniRef100_LVAIKSIR Lys1         | -19.9 |
| JAK1 domai | UniRef100_YDPEGDNT' Lys1        | -20.6 |
| CHK1       | UniRef100_LSKGDGLEF Protein Kin | -21.2 |
| NDR2       | UniRef100_DIKPDNLLLI Lys2       | -21.6 |
| MAP2K6     | UniRef100_DVKPSNVLI Lys2        | -21.6 |
| MASTL      | UniRef100_GAFGKVYLC ATP Loop    | -21.7 |
| MAP3K15, I | UniRef100_IAIKEIPER Lys1        | -21.9 |
| SMG1       | UniRef100_SYPYLFKGLI ATP        | -22.0 |
| IKKb       | UniRef100_DLKPENIVLI Lys2       | -22.2 |
| NDR2       | UniRef100_DTGHYIAM Lys1         | -23.1 |
| PKR        | UniRef100_DLKPSNIFL\ Lys2       | -24.4 |
| EphA2      | UniRef100_VLEDDPEAT Activation  | -24.6 |
| HER2/ErbB: | UniRef100_LLDIDETEYf Activation | -24.8 |
| NLK        | UniRef100_DIKPGNLLV Lys2        | -24.8 |

|             |                      |             |       |
|-------------|----------------------|-------------|-------|
| CDK7        | UniRef100_DLKPNLLLL  | Lys2        | -25.7 |
| MST4, YSK1  | UniRef100_DIKAANVLL  | Lys2        | -26.5 |
| YANK3       | UniRef100_DVKPDNILL  | Lys2        | -29.4 |
| MARK3, M    | UniRef100_EVAIKIIDK  | Lys1        | -31.4 |
| PIK3C3      | UniRef100_TEDGGKYP   | ATP         | -33.5 |
| MARK1       | UniRef100_EVAVKIIDK1 | Lys1        | -34.1 |
| AurA, AurB  | UniRef100_GKFGNVYL   | ATP Loop    | -34.2 |
| MARK2       | UniRef100_EVAVKIIDK1 | Lys1        | -35.0 |
| MST2        | UniRef100_ESGQVVAIK  | Lys1        | -36.1 |
| MASTL       | UniRef100_LYAVKVVK   | Lys1        | -38.1 |
| MARK3       | UniRef100_EVAIKIIDK1 | Lys1        | -39.4 |
| ATM         | UniRef100_QLVKGRDD   | ATP         | -39.7 |
| AGK         | UniRef100_ATVFLNPA   | ATP         | -40.0 |
| TLK1        | UniRef100_YLNEIKPPII | Lys2        | -40.3 |
| FYN, SRC, Y | UniRef100_QGAKFPIKV  | Activation  | -40.7 |
| p70S6K, p70 | UniRef100_GGYGKVFQ   | ATP Loop    | -41.1 |
| CASK        | UniRef100_ETGQQFAV   | Lys1        | -41.8 |
| TLK2        | UniRef100_YLNEIKPPII | Lys2        | -42.0 |
| MAST3       | UniRef100_DLKPDNLLI  | Lys2        | -42.6 |
| PKD1, PKD2  | UniRef100_NIVHCDLKP  | Lys2        | -43.1 |
| CHED        | UniRef100_DIKCSNILLN | Lys2        | -43.2 |
| GCN2        | UniRef100_DLKPVNIFLI | Lys2        | -44.7 |
| MARK1, M    | UniRef100_EVAVKIIDK  | Lys1        | -45.0 |
| ROCK1, RO   | UniRef100_DVKPDNMI   | Lys2        | -45.5 |
| PKR         | UniRef100_IGDFGLVTS  | Activation  | -46.0 |
| GPRK5       | UniRef100_DLKPENILLI | Lys2        | -46.7 |
| MAST1, M    | UniRef100_DLKPDNLLI  | Lys2        | -46.7 |
| TLK1        | UniRef100_YAAVKIHQL  | Lys1        | -46.7 |
| MST3        | UniRef100_DIKAANVLL  | Lys2        | -47.1 |
| PIK3CB      | UniRef100_VFGEDSVG   | ATP         | -47.5 |
| NuaK1       | UniRef100_VVAIKSIR   | Lys1        | -50.7 |
| TLK2        | UniRef100_YVAVKIHQL  | Lys1        | -52.2 |
| GCN2        | UniRef100_LDGCCYAVI  | Lys1        | -52.6 |
| MST4        | UniRef100_TQQVVAIKI  | Lys1        | -52.7 |
| CDK11, CD   | UniRef100_DLKPANILV  | Lys2        | -52.7 |
| MST3        | UniRef100_VVAIKIDLE  | Lys1        | -52.8 |
| ANPa        | UniRef100_GMLFLHNG   | Lys2        | -53.7 |
| MARK2, M    | UniRef100_DLKAENLLL  | Lys2        | -54.4 |
| FRAP        | UniRef100_IQSIAPSLQ  | ATP         | -54.7 |
| PI4KA, PI4K | UniRef100_SGTPMQSA   | ATP         | -56.6 |
| eEF2K       | UniRef100_YIKYNSNSG  | ATP         | -56.8 |
| ROCK1       | UniRef100_KLQLELNQE  | Protein Kin | -56.9 |
| MPSK1       | UniRef100_DLKPTNILL  | Lys2        | -60.2 |
| MLKL        | UniRef100_APVAIKVFK  | Lys1        | -64.5 |
| PKCi        | UniRef100_DLKLDNVLL  | Lys2        | -69.7 |
| PKD3        | UniRef100_NIVHCDLKP  | Lys2        | -72.1 |
| JAK1 domai  | UniRef100_IGDFGLTKA  | Activation  | -72.8 |
| TAO1, TAO   | UniRef100_DIKAGNILL1 | Lys2        | -75.6 |
| CDK10       | UniRef100_DLKVSNLLM  | Lys2        | -77.8 |

|            |                                 |        |
|------------|---------------------------------|--------|
| AurB       | UniRef100_SHFIVALKVI Lys1       | -79.5  |
| CK1d, CK1e | UniRef100_DVKPDNFLI Lys2        | -80.1  |
| ATR        | UniRef100_FYIMMCKPI ATP         | -82.1  |
| CK1a       | UniRef100_DIKPDNFLM Lys2        | -82.7  |
| GSK3A      | UniRef100_DIKPQNLLV Lys2        | -85.7  |
| IRE1       | UniRef100_DLKPHNILIS Lys2       | -89.0  |
| PKN2       | UniRef100_DLKLDNLLI Lys2        | -90.1  |
| VRK2       | UniRef100_MLDVLEYIH Lys2        | -94.4  |
| PKCi       | UniRef100_IYAMKVVK Lys1         | -95.6  |
| CK1g1      | UniRef100_DVKPENFLI Lys2        | -95.6  |
| GSK3B      | UniRef100_DIKPQNLLI Lys2        | -102.4 |
| CDK9       | UniRef100_DMKAANVI Lys2         | -113.0 |
| DNAPK      | UniRef100_KGGSWIQE ATP          | -125.3 |
| EGFR       | UniRef100_IPVAIKELR Lys1        | -133.8 |
| PRP4       | UniRef100_CNILHADIKI Lys2       | -135.8 |
| TAO2       | UniRef100_DVKAGNILL Lys2        | -139.7 |
| CRK7       | UniRef100_DIKCSNILLN Lys2       | -140.8 |
| CK1g2      | UniRef100_DVKPENFLV Lys2        | -143.8 |
| PIP4K2A    | UniRef100_AKELPTLKD ATP         | -154.2 |
| DNAPK      | UniRef100_EHPFLVKGC ATP         | -169.9 |
| PRP4       | UniRef100_AAGIGKDFK Protein Kin | -191.7 |
| PRPK       | UniRef100_FLSGLELVK( ATP Loop   | -200.7 |
| PITSLRE    | UniRef100_DLKTSNLLI Lys2        | -230.7 |
| CLK3       | UniRef100_YEIVGNLGE ATP Loop    | -335.4 |

sal kinase (e.g. lipid kinase)

se domain, **possibly not in ATP binding site**

side of the protein kinase domain, **possibly not in ATP binding site**

signal (>2 fold increase)

: **considered significant are left uncolored**
