# Supplementary material
Source: PubMed Central journal article supplement (PMC5973797)
Supplement: NIHMS968273-supplement-Suppl_Table_3.pdf [file NIHMS968273-supplement-Suppl_Table_3.pdf]

## ounds in HeLa live cell, with or without washout

| Kinase                                   | Labeling Site   | No washout |          |
|------------------------------------------|-----------------|------------|----------|
|                                          |                 | Alectinib  | SRPKIN-1 |
|                                          |                 | 5μM        | 5μM      |
| CLK3                                     | Lys2            | ND         | ND       |
| EphB2                                    | Activation Loop | ND         | ND       |
| STLK6                                    | Lys1            | ND         | ND       |
| YSK1                                     | Lys1            | ND         | ND       |
| ZC3/MINK                                 | Lys1            | ND         | ND       |
| CHK2                                     | Lys2            | >99        | 44.7     |
| CaMKK2                                   | Lys1            | >98        | 68.8     |
| CHK2                                     | Lys1            | >98        | 31.5     |
| SRPK1, SRPK2                             | Lys1            | >95        | >95      |
| CaMKK2                                   | Lys2            | 96.1       | 27.6     |
| FER                                      | Lys1            | 95.4       | 11.0     |
| SRPK1                                    | Lys2            | 92.4       | >99      |
| CaMK4                                    | Lys2            | 91.9       | 89.6     |
| ACK                                      | Lys1            | 90.4       | 27.3     |
| CaMK2d                                   | Lys1            | 85.1       | -16.6    |
| RSK1 domain1                             | Lys2            | 84.7       | -4.9     |
| RSK2 domain1                             | Activation Loop | 84.3       | -10.8    |
| RSK2 domain1                             | Lys2            | 84.2       | -8.9     |
| RSK1 domain1                             | Activation Loop | 83.6       | 3.7      |
| RSK1 domain1                             | Lys1            | 83.5       | 5.6      |
| RSK1 domain1, RSK2 domain1, RSK3 domain1 | Lys2            | 82.9       | -4.3     |
| CaMK2g                                   | Lys1            | 81.9       | -32.1    |
| FER                                      | Activation Loop | 80.9       | 6.6      |
| RSK1 domain2                             | Lys2            | 78.5       | 13.4     |
| MELK                                     | Lys2            | 78.5       | 7.2      |
| STLK5                                    | Activation Loop | 76.6       | 43.4     |
| IRAK1                                    | Lys2            | 76.5       | 16.4     |
| CaMKK1                                   | Lys2            | 74.3       | 2.7      |
| EphB4                                    | Activation Loop | 73.7       | -15.8    |
| KHS2                                     | Lys1            | 70.7       | -5.6     |
| CaMK2a, CaMK2b, CaMK2d, CaMK2g           | Lys2            | 68.0       | -15.5    |
| RSK2 domain2                             | Lys2            | 66.9       | 9.2      |
| STLK3                                    | Lys2            | 66.1       | 47.7     |
| RSK2 domain1                             | ATP Loop        | 65.9       | -19.5    |
| LOK                                      | Lys2            | 65.8       | 40.5     |
| SLK                                      | Lys2            | 61.4       | 37.1     |
| FAK                                      | Activation Loop | 57.0       | 24.5     |
| FAK                                      | Lys1            | 54.8       | 11.5     |
| IRAK4                                    | Lys2            | 53.2       | 24.0     |
| SNRK                                     | Lys1            | 52.5       | -1.8     |
| SNRK                                     | Lys2            | 51.6       | 18.4     |
| PHKg2                                    | Lys1            | 51.4       | 16.3     |
| IRAK4                                    | Lys1            | 51.0       | 10.3     |
| MAP3K2, MAP3K3                           | Lys2            | 46.9       | 25.5     |

|                             |                       |      |       |
|-----------------------------|-----------------------|------|-------|
| SGK3                        | Lys1                  | 46.5 | -1.7  |
| MAP3K4                      | Lys2                  | 46.5 | 25.9  |
| PIP4K2C                     | ATP                   | 44.3 | 29.9  |
| OSR1                        | Lys2                  | 43.9 | 26.7  |
| KHS1                        | Lys1                  | 42.2 | -5.2  |
| PIP4K2C                     | ATP                   | 42.2 | 33.5  |
| ILK                         | Protein Kinase Domain | 41.9 | 32.9  |
| ULK3                        | Lys2                  | 41.1 | 8.7   |
| p70S6Kb                     | Lys2                  | 40.6 | 19.1  |
| KSR1                        | Activation Loop       | 39.3 | 18.3  |
| LOK                         | Lys1                  | 38.5 | -14.9 |
| BRAF                        | Lys2                  | 37.8 | 10.9  |
| PIK3C2B                     | ATP                   | 37.7 | 24.0  |
| GCK                         | Lys2                  | 37.3 | 23.5  |
| ULK3                        | Lys1                  | 34.1 | 10.1  |
| RSKL1                       | ATP                   | 33.9 | 32.7  |
| NEK3                        | Activation Loop       | 33.6 | 5.0   |
| ARAF                        | Lys2                  | 33.4 | -4.7  |
| STLK6                       | Lys2                  | 33.1 | -17.1 |
| LATS1                       | Lys1                  | 32.6 | 8.5   |
| SGK3                        | Lys2                  | 31.7 | 16.6  |
| PAN3                        | ATP                   | 30.9 | 29.7  |
| TAK1                        | Lys2                  | 30.4 | 15.9  |
| LYN                         | Activation Loop       | 30.2 | -18.1 |
| MAP2K7                      | Lys2                  | 29.9 | 18.5  |
| PLK1                        | Lys2                  | 28.6 | 19.9  |
| LATS2                       | Lys1                  | 28.5 | 28.1  |
| IKKe, TBK1                  | Lys2                  | 27.5 | 14.3  |
| MAP2K5                      | Lys2                  | 27.4 | 26.9  |
| TBK1                        | Lys1                  | 26.7 | 4.1   |
| NEK8                        | Lys2                  | 26.6 | 5.3   |
| PFTAIRE1                    | Lys2                  | 26.3 | 21.4  |
| ZC1/HGK, ZC2/TNIK, ZC3/MINK | Lys2                  | 26.2 | -3.6  |
| KSR1, KSR2                  | Activation Loop       | 25.6 | 14.6  |
| Erk5                        | Lys2                  | 25.6 | -0.3  |
| AMPKa1, AMPKa2              | Lys2                  | 25.0 | 12.4  |
| PFTAIRE1                    | Lys1                  | 24.5 | 3.5   |
| LATS1                       | Lys2                  | 24.4 | 5.0   |
| Wnk1, Wnk2, Wnk3            | Lys2                  | 24.4 | 8.2   |
| ULK1                        | Lys2                  | 24.2 | 12.8  |
| MET                         | Lys1                  | 23.6 | -1.2  |
| MAPKAPK3                    | ATP Loop              | 22.7 | -4.8  |
| LYN                         | Lys1                  | 22.7 | 6.4   |
| PKD3                        | Lys1                  | 21.7 | 26.8  |
| Erk2                        | Lys2                  | 20.2 | 15.1  |
| GCK                         | Lys1                  | 19.6 | -11.0 |
| p38a                        | Protein Kinase Domain | 18.6 | 4.4   |
| PCTAIRE1, PCTAIRE3          | Lys2                  | 18.5 | 3.3   |
| CHK1                        | Lys2                  | 18.4 | 7.7   |

|                           |                       |      |       |
|---------------------------|-----------------------|------|-------|
| p70S6K                    | Lys2                  | 17.7 | 24.5  |
| Erk1                      | Lys2                  | 17.7 | 14.0  |
| MLK3                      | Lys2                  | 17.7 | 5.8   |
| p38a                      | Lys2                  | 17.4 | 17.0  |
| MSK2 domain1              | Lys2                  | 17.2 | -3.7  |
| p38d, p38g                | Lys2                  | 16.9 | 26.5  |
| FGFR1, FMS, PDGFRb, TYRO3 | Lys1                  | 16.6 | -12.5 |
| PCTAIRE2, PCTAIRE3        | Lys1                  | 15.5 | -10.0 |
| MAP2K3                    | Lys1                  | 15.4 | 14.1  |
| NEK6, NEK7                | Lys2                  | 15.1 | 2.0   |
| AKT2, AKT3                | ATP Loop              | 13.8 | -6.5  |
| MAP3K5                    | Lys2                  | 13.5 | -2.6  |
| JNK1, JNK2, JNK3          | Lys2                  | 13.4 | 6.2   |
| MAP2K5                    | Lys1                  | 12.8 | -7.4  |
| CaMK1d                    | Lys1                  | 12.3 | -2.8  |
| HER2/ErbB2                | Lys1                  | 11.6 | -1.6  |
| AMPKa1, AMPKa2            | Lys1                  | 11.4 | -11.1 |
| CSK                       | Activation Loop       | 10.7 | 2.7   |
| PLK1                      | Lys1                  | 10.4 | -1.5  |
| ZAK                       | Lys1                  | 9.4  | -2.7  |
| ILK                       | Lys1                  | 8.6  | 0.2   |
| PCTAIRE1                  | Lys1                  | 7.7  | 2.1   |
| MST1, MST2                | Lys2                  | 7.2  | 0.4   |
| AMPKa1                    | ATP Loop              | 7.0  | -17.2 |
| AKT1                      | ATP Loop              | 6.8  | -13.3 |
| MLK4                      | Lys2                  | 6.5  | 4.3   |
| CaMK1a                    | Lys1                  | 6.2  | -12.2 |
| EGFR                      | Activation Loop       | 5.2  | -7.7  |
| Wnk1, Wnk2, Wnk4          | Activation Loop       | 5.1  | -2.0  |
| PI4KB                     | ATP                   | 4.8  | -26.0 |
| CaMK1d                    | Lys2                  | 4.2  | 1.9   |
| Wnk1, Wnk2                | ATP Loop              | 4.0  | -2.7  |
| PI4KB                     | ATP                   | 3.9  | -5.2  |
| SMG1                      | ATP                   | 3.7  | -0.3  |
| MAP2K1, MAP2K2            | Lys1                  | 3.4  | -2.5  |
| PKN1                      | Lys2                  | 3.0  | 19.4  |
| NEK9                      | Lys2                  | 2.7  | -2.6  |
| MAP2K3                    | Lys2                  | 2.6  | -11.4 |
| MAP2K6                    | Lys1                  | 2.2  | 14.8  |
| CDK5                      | Lys2                  | 1.8  | -2.3  |
| CDK2                      | Lys1                  | 1.3  | 6.8   |
| CCRK                      | Lys2                  | 1.1  | -5.3  |
| MSK1 domain1              | Lys2                  | 0.8  | 7.9   |
| MAP3K2                    | Lys1                  | 0.4  | 1.5   |
| CDC2                      | Lys2                  | -0.5 | -1.9  |
| IKKa                      | Lys2                  | -1.6 | 5.5   |
| p38b                      | Protein Kinase Domain | -1.9 | 8.8   |
| NEK9                      | Lys1                  | -2.0 | -3.9  |
| CDC2                      | Lys2                  | -2.7 | -5.4  |

|                         |                       |       |       |
|-------------------------|-----------------------|-------|-------|
| CDK5                    | Lys1                  | -3.4  | -16.2 |
| LATS2                   | Lys2                  | -4.0  | -5.1  |
| MAP3K3                  | Lys1                  | -4.1  | -34.5 |
| MAP2K1, MAP2K2          | Lys2                  | -4.2  | -3.7  |
| NEK1                    | Lys2                  | -4.4  | 2.4   |
| ITPK1                   | ATP                   | -4.6  | -16.0 |
| NEK4                    | Lys2                  | -5.8  | 1.3   |
| PEK                     | Lys2                  | -6.0  | 28.0  |
| NDR1                    | Lys1                  | -7.1  | 22.0  |
| NDR1                    | Lys2                  | -7.7  | -4.7  |
| MAP2K4                  | Lys2                  | -9.1  | -1.0  |
| ABL, ARG                | Lys1                  | -9.3  | 15.9  |
| NEK7                    | Lys1                  | -9.3  | -12.9 |
| MAP2K1                  | Lys2                  | -9.4  | 11.8  |
| PIP5K3                  | ATP                   | -9.6  | -0.5  |
| AurA                    | Lys1                  | -9.6  | -9.1  |
| SGK                     | Lys1                  | -10.2 | -6.4  |
| CDK7                    | Lys1                  | -11.8 | -21.0 |
| JAK1                    | Protein Kinase Domain | -12.0 | -46.8 |
| CK2a1                   | Protein Kinase Domain | -12.2 | -1.1  |
| PKD2                    | Lys1                  | -12.3 | 3.6   |
| IKKe                    | Lys1                  | -12.7 | -63.5 |
| MAP2K4                  | Lys1                  | -12.7 | 20.4  |
| MAP3K6                  | Lys2                  | -12.9 | -2.0  |
| SLK                     | Lys1                  | -13.4 | -20.5 |
| IKKb                    | Lys1                  | -13.7 | 23.5  |
| MST1                    | Lys1                  | -13.8 | -17.1 |
| PIK3C3                  | ATP                   | -13.8 | -21.3 |
| AurA                    | Lys2                  | -14.5 | -12.9 |
| MET                     | Activation Loop       | -15.1 | 19.7  |
| CSK                     | Lys1                  | -15.7 | -27.7 |
| MAP3K1                  | Lys2                  | -16.6 | -27.3 |
| BARK1                   | Lys2                  | -17.1 | -7.8  |
| CDK2                    | Lys2                  | -17.5 | -0.2  |
| PKN1                    | Lys1                  | -17.8 | 16.0  |
| ABL, ARG                | Activation Loop       | -18.2 | 3.5   |
| NuaK2                   | Lys1                  | -19.9 | -76.7 |
| JAK1 domain2            | Lys1                  | -20.6 | -10.7 |
| CHK1                    | Protein Kinase Domain | -21.2 | 2.7   |
| NDR2                    | Lys2                  | -21.6 | -18.6 |
| MAP2K6                  | Lys2                  | -21.6 | -0.9  |
| MASTL                   | ATP Loop              | -21.7 | -3.6  |
| MAP3K15, MAP3K5, MAP3K6 | Lys1                  | -21.9 | -15.3 |
| SMG1                    | ATP                   | -22.0 | -17.4 |
| IKKb                    | Lys2                  | -22.2 | 16.2  |
| NDR2                    | Lys1                  | -23.1 | 11.8  |
| PKR                     | Lys2                  | -24.4 | 3.4   |
| EphA2                   | Activation Loop       | -24.6 | -11.4 |
| HER2/ErbB2              | Activation Loop       | -24.8 | -12.8 |

|                  |                       |       |       |
|------------------|-----------------------|-------|-------|
| NLK              | Lys2                  | -24.8 | 7.7   |
| CDK7             | Lys2                  | -25.7 | -5.9  |
| MST4, YSK1       | Lys2                  | -26.5 | 10.7  |
| YANK3            | Lys2                  | -29.4 | -9.6  |
| MARK3, MARK4     | Lys1                  | -31.4 | -8.8  |
| PIK3C3           | ATP                   | -33.5 | -25.7 |
| MARK1            | Lys1                  | -34.1 | -27.8 |
| AurA, AurB, AurC | ATP Loop              | -34.2 | -18.6 |
| MARK2            | Lys1                  | -35.0 | -3.0  |
| MST2             | Lys1                  | -36.1 | -7.1  |
| MASTL            | Lys1                  | -38.1 | -13.3 |
| MARK3            | Lys1                  | -39.4 | -18.4 |
| ATM              | ATP                   | -39.7 | -15.1 |
| AGK              | ATP                   | -40.0 | -18.1 |
| TLK1             | Lys2                  | -40.3 | -16.7 |
| FYN, SRC, YES    | Activation Loop       | -40.7 | -39.4 |
| p70S6K, p70S6Kb  | ATP Loop              | -41.1 | -13.7 |
| CASK             | Lys1                  | -41.8 | -20.4 |
| TLK2             | Lys2                  | -42.0 | -19.6 |
| MAST3            | Lys2                  | -42.6 | -12.6 |
| PKD1, PKD2       | Lys2                  | -43.1 | -2.1  |
| CHED             | Lys2                  | -43.2 | -4.6  |
| GCN2             | Lys2                  | -44.7 | -10.5 |
| MARK1, MARK2     | Lys1                  | -45.0 | -6.9  |
| ROCK1, ROCK2     | Lys2                  | -45.5 | 29.2  |
| PKR              | Activation Loop       | -46.0 | -26.0 |
| GPRK5            | Lys2                  | -46.7 | -39.1 |
| MAST1, MAST2     | Lys2                  | -46.7 | 3.5   |
| TLK1             | Lys1                  | -46.7 | -28.6 |
| MST3             | Lys2                  | -47.1 | -6.2  |
| PIK3CB           | ATP                   | -47.5 | -8.3  |
| NuaK1            | Lys1                  | -50.7 | -31.0 |
| TLK2             | Lys1                  | -52.2 | -31.9 |
| GCN2             | Lys1                  | -52.6 | -26.7 |
| MST4             | Lys1                  | -52.7 | -37.0 |
| CDK11, CDK8      | Lys2                  | -52.7 | 20.7  |
| MST3             | Lys1                  | -52.8 | -22.2 |
| ANPa             | Lys2                  | -53.7 | -5.3  |
| MARK2, MARK3     | Lys2                  | -54.4 | 4.1   |
| FRAP             | ATP                   | -54.7 | -37.8 |
| PI4KA, PI4KAP2   | ATP                   | -56.6 | -29.0 |
| eEF2K            | ATP                   | -56.8 | -16.9 |
| ROCK1            | Protein Kinase Domain | -56.9 | 0.0   |
| MPSK1            | Lys2                  | -60.2 | -3.4  |
| MLKL             | Lys1                  | -64.5 | -32.2 |
| PKCi             | Lys2                  | -69.7 | -1.5  |
| PKD3             | Lys2                  | -72.1 | -6.3  |
| JAK1 domain2     | Activation Loop       | -72.8 | -36.4 |
| TAO1, TAO3       | Lys2                  | -75.6 | 1.7   |

|            |                       |        |        |
|------------|-----------------------|--------|--------|
| CDK10      | Lys2                  | -77.8  | -17.0  |
| AurB       | Lys1                  | -79.5  | -48.2  |
| CK1d, CK1e | Lys2                  | -80.1  | -11.6  |
| ATR        | ATP                   | -82.1  | 6.1    |
| CK1a       | Lys2                  | -82.7  | -0.9   |
| GSK3A      | Lys2                  | -85.7  | -19.0  |
| IRE1       | Lys2                  | -89.0  | -22.9  |
| PKN2       | Lys2                  | -90.1  | 3.3    |
| VRK2       | Lys2                  | -94.4  | -19.8  |
| PKCi       | Lys1                  | -95.6  | -27.0  |
| CK1g1      | Lys2                  | -95.6  | -41.0  |
| GSK3B      | Lys2                  | -102.4 | -21.5  |
| CDK9       | Lys2                  | -113.0 | 19.1   |
| DNAPK      | ATP                   | -125.3 | -35.0  |
| EGFR       | Lys1                  | -133.8 | -11.8  |
| PRP4       | Lys2                  | -135.8 | -28.1  |
| TAO2       | Lys2                  | -139.7 | -32.7  |
| CRK7       | Lys2                  | -140.8 | 9.4    |
| CK1g2      | Lys2                  | -143.8 | -32.6  |
| PIP4K2A    | ATP                   | -154.2 | -32.9  |
| DNAPK      | ATP                   | -169.9 | -37.7  |
| PRP4       | Protein Kinase Domain | -191.7 | -34.0  |
| PRPK       | ATP Loop              | -200.7 | -36.9  |
| PITSLRE    | Lys2                  | -230.7 | -71.8  |
| CLK3       | ATP Loop              | -335.4 | -129.1 |

### Labeling Site Key

|                       |                                                                                                   |
|-----------------------|---------------------------------------------------------------------------------------------------|
| Lys1                  | Conserved Lysine 1                                                                                |
| Lys2                  | Conserved Lysine 2                                                                                |
| ATP Loop              | ATP binding loop                                                                                  |
| Activation Loop       | Activation loop                                                                                   |
| ATP                   | ATP site in non-canonical kinase (e.g. lipid kinase)                                              |
| Protein Kinase Domain | Other lysine within kinase domain, <b>possibly not in ATP binding site</b>                        |
| Other                 | Labeling of residue outside of the protein kinase domain, <b>possibly not in ATP binding site</b> |

|                                                                                     |                                                |
|-------------------------------------------------------------------------------------|------------------------------------------------|
|  | >90% Inhibition                                |
|  | 75 - 90% Inhibition                            |
|  | 50 - 75% Inhibition                            |
|  | 35 - 50% Inhibition                            |
|  | No change                                      |
|  | >100% increase in MS signal (>2 fold increase) |
| ND                                                                                  | Not determined                                 |

Data points inhibited >35% & not considered significant are left uncolored

**Note:** This KiNativ dataset is the result of an analysis of duplicate treated samples and either duplicate or quadruplicate control samples. The % changes in MS signals being reported are statistical

significant (Student T-test score  $<0.04$ ). Additionally, the KiNativ method is performed using biological matrices (cells/tissues), which can be inherently variable, followed by a complex procedure of sample preparation and mass spec analysis. Thus, we recommend the use of independent, biological replicates to determine the inter-sample variability of the dataset (i.e., repeating the experimental conditions more than one time and with an independent sample of the biological matrix in order to validate the dataset). In addition, we strongly recommend that customers obtain supporting data through additional independent KiNativ studies or through orthogonal approaches prior to making critical decisions.

The data reported was performed in a non-GLP manner and was not intended for regulatory submission. It was generated to provide scientific data for informational purposes only.

KiNativ project managers are available to discuss the results and assist customers in understanding strengths and limitations of this KiNativ dataset. ActivX Biosciences, Inc. bears no responsibility for decisions made by customers based on this KiNativ dataset or for any experimental suggestions made by KiNativ project managers.

Washout

SRPKIN-1 5μM

-0.6

11.3

-7.9

-19.9

-22.4

30.1

20.1

20.7

>95

17.1

-0.8

>98

-10.1

16.0

-0.9

7.9

11.1

3.4

15.9

25.3

10.5

-7.4

8.7

-4.5

11.3

-41.4

-7.1

3.9

-30.4

-3.8

1.1

-8.3

9.1

13.2

16.0

18.2

9.7

-25.9

15.4

-11.3

-3.0

-11.2

12.0

10.4



11.0  
15.5  
25.8  
5.3  
5.1  
23.1  
21.5  
-8.7  
11.8  
6.7  
-10.9  
3.1  
-6.3  
7.7  
4.5  
3.0  
-22.6  
10.2  
-23.9  
16.2  
12.8  
3.9  
22.1  
-41.3  
6.4  
4.9  
2.1  
-6.3  
-1.1  
-2.6  
10.0  
-4.1  
-9.1  
14.2  
13.3  
-9.2  
14.2  
17.5  
4.0  
0.3  
-35.7  
4.3  
-29.0  
-17.4  
2.6  
8.4  
9.2  
-9.4

ND

10.7  
1.9  
-12.9  
5.2  
14.4  
13.0  
-29.5  
1.7  
13.3  
12.3  
-4.0  
10.4  
2.1  
4.8  
4.9  
-14.2  
-4.7  
-3.6  
-7.4  
10.2  
4.7  
-7.7  
1.6  
-24.2  
-8.8  
1.4  
3.2  
-17.7  
5.1  
2.9  
1.9  
6.6  
0.3  
-0.7  
5.3  
-3.3  
-3.0  
10.3  
-1.1  
6.7  
-6.1  
9.4  
15.9  
-2.2  
-0.5  
2.1  
9.0  
0.0  
4.6

-9.2  
-4.6  
21.9  
4.2  
-0.6  
19.9  
4.5  
-6.9  
3.1  
11.2  
12.8  
-2.8  
9.8  
-8.3  
7.7  
-10.3  
6.3  
10.3  
-18.6  
4.2  
11.2  
10.8  
-2.3  
17.1  
-14.7  
4.9  
0.7  
-9.9  
-13.4  
-20.6  
2.8  
-19.6  
6.9  
-3.2  
16.2  
-17.5  
3.7  
-9.4  
10.0  
-6.3  
-1.0  
16.8  
-4.0  
1.4  
6.8  
-3.2  
2.5  
-21.3  
-20.6

13.0  
-0.5  
-1.7  
-2.9  
-1.4  
-4.9  
1.2  
-3.5  
-1.2  
-9.3  
10.0  
-2.6  
-12.0  
-0.9  
-8.5  
-21.1  
3.2  
-14.1  
-15.0  
1.9

ND

-16.8  
-29.2  
-14.5  
-16.3  
-5.9  
-5.2  
-13.1  
3.0  
-2.3  
-0.9  
-33.9  
-3.6  
-40.7  
4.1  
-4.0  
-12.7  
-31.5  
-12.7  
-10.1  
2.6  
-3.5  
-1.9  
-38.5  
-0.4  
11.2  
-13.0  
-14.2  
-17.1

2.8  
-8.4  
-7.9  
0.5  
0.1  
-2.1  
-29.0  
16.7  
-17.7  
6.4  
-16.2  
-10.6  
3.4  
-19.7  
-10.3  
-17.3  
-15.3  
-4.9  
-32.7  
-9.5  
-18.0  
-14.3  
-7.3  
-12.1  
2.3

ing site  
sibly not in ATP binding site

uplicate  
istically

ological  
sample  
plicates  
ditions  
ate the  
ditional  
project

mission.

ing the  
lity for  
offered
